# Supplementary material
Source: PubMed Central journal article supplement (PMC2795645)
Supplement: jc.2009-1460_1.pdf [file jc.2009-1460_1.pdf]

**Supplementary Table 1.** Oligonucleotide sequences for site-directed mutagenesis.

| <b>Name</b> | <b>Sequence</b>                          | <b>NCBI accession no.<br/>and location</b> |
|-------------|------------------------------------------|--------------------------------------------|
| N185K       | CTACGAGCACTTCAA <u>A</u> GCCATGGGCAAGTAC | NM_000941.2; 555                           |
| delE217     | CGATGGGAACTTGGAGGA***CTTCATCACCTGGCGAGA  | NM_000941.2; 651-653                       |
| L577R       | CGGATGAGGACTACC <u>G</u> GTACCGGGAGGAGCT | NM_000941.2; 1730                          |

Boldface and underline bases indicate a nucleotide change. The numbering of nucleotides is based on the NCBI human POR c.DNA sequence NM\_000941.2. The numbering of the amino acid residues is based on the NCBI human POR protein reference sequence NP\_000932.2. \*, three nucleotides deletion ( $\Delta$ GGA) at base 651-653.
